# Supplementary material
Source: PubMed Central journal article supplement (PMC6932236)
Supplement: JB.00353-19-s0001.pdf [file JB.00353-19-s0001.pdf]

Table S1: *E. coli* isolates screened for putative microcin gene cluster

| Strain   | Biosample   | SRR number | Sample Source           |
|----------|-------------|------------|-------------------------|
| PSU-0388 | CFSAN074663 | SRR7250127 | Cow, (Bovine)           |
| PSU-0389 | CFSAN074664 | SRR7284516 | Cow, (Bovine)           |
| PSU-0390 | CFSAN074665 | SRR7284874 | Cow, (Bovine)           |
| PSU-0391 | CFSAN074666 | SRR7284885 | Cow, (Bovine)           |
| PSU-0392 | CFSAN074667 | SRR7284863 | Cow, (Bovine)           |
| PSU-0393 | CFSAN074668 | SRR7284859 | Cow, (Bovine)           |
| PSU-0394 | CFSAN074669 | SRR7284663 | Cow, (Bovine)           |
| PSU-0395 | CFSAN074670 | SRR7284868 | Pig, (Porcine)          |
| PSU-0397 | CFSAN074672 | SRR7284660 | Cow, (Bovine)           |
| PSU-0398 | CFSAN074673 | SRR7284539 | Food, Lettuce - Romaine |
| PSU-0399 | CFSAN074674 | SRR7284469 | Food, Lettuce - Romaine |
| PSU-0400 | CFSAN074675 | SRR7284434 | Food, Lettuce - Romaine |
| PSU-0401 | CFSAN074676 | SRR7284856 | Cow, (Bovine)           |
| PSU-0402 | CFSAN074677 | SRR7284656 | Food, Lettuce - Leaf    |
| PSU-0403 | CFSAN074678 | SRR7284873 | Food, Lettuce - Romaine |
| PSU-0404 | CFSAN074679 | SRR7284376 | Food, Lettuce - Romaine |
| PSU-0405 | CFSAN074680 | SRR7284801 | Food, Lettuce - Romaine |
| PSU-0406 | CFSAN074681 | SRR7284183 | Food, Cantaloupe        |
| PSU-0407 | CFSAN074682 | SRR7284338 | Food, Celery            |
| PSU-0408 | CFSAN074683 | SRR7284693 | Food, Celery            |
| PSU-0409 | CFSAN074684 | SRR7284820 | Food, Lettuce - Romaine |
| PSU-0410 | CFSAN074685 | SRR7284866 | Food, Lettuce - Romaine |
| PSU-0411 | CFSAN074686 | SRR7283820 | Food, Lettuce - Romaine |
| PSU-0412 | CFSAN074687 | SRR7284855 | Food, Lettuce - Romaine |
| PSU-0413 | CFSAN074688 | SRR7284563 | Food, Lettuce - Romaine |
| PSU-0414 | CFSAN074689 | SRR7284862 | Food, Lettuce - Romaine |
| PSU-0415 | CFSAN074690 | SRR7284879 | Food, Lettuce - Romaine |
| PSU-0425 | CFSAN074700 | SRR7427138 | Food, Celery            |
| PSU-0426 | CFSAN074701 | SRR7427254 | Food, Celery            |
| PSU-0436 | CFSAN074711 | SRR7264054 | Food, Lettuce - Leaf    |
| PSU-0437 | CFSAN074712 | SRR7263703 | Food, Lettuce - Leaf    |
| PSU-0438 | CFSAN074713 | SRR7264114 | Food, Lettuce - Romaine |
| PSU-0439 | CFSAN074714 | SRR7263711 | Food, Lettuce - Romaine |
| PSU-0440 | CFSAN074715 | SRR7263692 | Food, Lettuce - Romaine |
| PSU-0441 | CFSAN074716 | SRR7263259 | Food, Lettuce - Romaine |
| PSU-0442 | CFSAN074717 | SRR7264563 | Food, Lettuce - Romaine |
| PSU-0465 | CFSAN074740 | SRR6920769 | Pig, (Porcine)          |
| PSU-0466 | CFSAN074741 | SRR6919274 | missing                 |
| PSU-0467 | CFSAN074742 | SRR6919237 | Food, Dairy Products    |
| PSU-0468 | CFSAN074743 | SRR6919270 | Avian                   |
| PSU-0469 | CFSAN074744 | SRR6919276 | Pig, (Porcine)          |
| PSU-0470 | CFSAN074745 | SRR6919142 | Avian                   |
| PSU-0471 | CFSAN074746 | SRR6919164 | Avian                   |
| PSU-0472 | CFSAN074747 | SRR6919109 | Avian                   |
| PSU-0473 | CFSAN074748 | SRR6919146 | Avian                   |
| PSU-0474 | CFSAN074749 | SRR6919176 | Avian                   |
| PSU-0475 | CFSAN074750 | SRR6919230 | Antelope, Blesbok       |
| PSU-0476 | CFSAN074751 | SRR6919205 | Pig, (Porcine)          |
| PSU-0477 | CFSAN074752 | SRR6920517 | Pig, (Porcine)          |
| PSU-0478 | CFSAN074753 | SRR6921447 | Pig, (Porcine)          |

|          |             |            |                   |
|----------|-------------|------------|-------------------|
| PSU-0479 | CFSAN074754 | SRR6921434 | missing           |
| PSU-0480 | CFSAN074755 | SRR6921455 | Duck, (Avian)     |
| PSU-0481 | CFSAN074756 | SRR7094503 | Cow, (Bovine)     |
| PSU-0482 | CFSAN074757 | SRR6920547 | Sheep, (Ovine)    |
| PSU-0483 | CFSAN074758 | SRR6921309 | Pig, (Porcine)    |
| PSU-0484 | CFSAN074759 | SRR6921407 | Food, Ground Beef |
| PSU-0487 | CFSAN074762 | SRR6903154 | Food, Ground Beef |
| PSU-0489 | CFSAN074764 | SRR6902910 | Chicken, (Avian)  |
| PSU-0490 | CFSAN074765 | SRR6902807 | Pigeon, (Avian)   |
| PSU-0491 | CFSAN074766 | SRR6902735 | Chicken, (Avian)  |
| PSU-0492 | CFSAN074767 | SRR6902864 | Avian             |
| PSU-0493 | CFSAN074768 | SRR6903131 | Chicken, (Avian)  |
| PSU-0494 | CFSAN074769 | SRR6930600 | Chicken, (Avian)  |
| PSU-0495 | CFSAN074770 | SRR6930879 | Pheasant, (Avian) |
| PSU-0496 | CFSAN074771 | SRR6930653 | Horse (Equine)    |
| PSU-0497 | CFSAN074772 | SRR6930493 | Dog (Canine)      |
| PSU-0498 | CFSAN074773 | SRR6930597 | Food, Carrot      |
| PSU-0499 | CFSAN074774 | SRR6930192 | Food, Carrot      |
| PSU-0500 | CFSAN074775 | SRR6930201 | Food, Carrot      |
| PSU-0501 | CFSAN074776 | SRR6930202 | Food, Carrot      |
| PSU-0502 | CFSAN074777 | SRR6930654 | Horse (Equine)    |
| PSU-0503 | CFSAN074778 | SRR6930198 | Dog (Canine)      |
| PSU-0504 | CFSAN074779 | SRR6930872 | Dog (Canine)      |
| PSU-0505 | CFSAN074780 | SRR6902707 | Dog (Canine)      |
| PSU-0506 | CFSAN074781 | SRR6903163 | Cow, (Bovine)     |
| PSU-0507 | CFSAN074782 | SRR6902881 | Cow, (Bovine)     |
| PSU-0508 | CFSAN074783 | SRR6902768 | Pig, (Porcine)    |
| PSU-0509 | CFSAN074784 | SRR6902874 | Cow, (Bovine)     |
| PSU-0510 | CFSAN074785 | SRR6903164 | Chicken, (Avian)  |
| PSU-0511 | CFSAN074786 | SRR6902896 | Chicken, (Avian)  |
| PSU-0514 | CFSAN079477 | SRR7135441 | chicken           |
| PSU-0515 | CFSAN079478 | SRR7135463 | pig               |
| PSU-0516 | CFSAN079479 | SRR7135410 | cow               |
| PSU-0517 | CFSAN079480 | SRR6986358 | chicken           |
| PSU-0518 | CFSAN079481 | SRR6985954 | cow               |
| PSU-0519 | CFSAN079482 | SRR6986389 | chicken           |
| PSU-0520 | CFSAN079483 | SRR6986084 | pig               |
| PSU-0521 | CFSAN079484 | SRR7135448 | chicken           |
| PSU-0522 | CFSAN079485 | SRR7135443 | cow               |
| PSU-0523 | CFSAN079486 | SRR7135459 | pig               |
| PSU-0524 | CFSAN079487 | SRR7135442 | turkey            |
| PSU-0525 | CFSAN079488 | SRR6986385 | turkey            |
| PSU-0526 | CFSAN079489 | SRR6985833 | Antelope          |
| PSU-0527 | CFSAN079490 | SRR6985969 | Ferret            |
| PSU-0528 | CFSAN079491 | SRR6986225 | turkey            |
| PSU-0529 | CFSAN079492 | SRR6986368 | cow               |
| PSU-0530 | CFSAN079493 | SRR6986334 | cow               |
| PSU-0531 | CFSAN079494 | SRR6985968 | pig               |
| PSU-0532 | CFSAN079495 | SRR6986340 | turkey            |
| PSU-0533 | CFSAN079496 | SRR6986343 | turkey            |
| PSU-0534 | CFSAN079497 | SRR6986086 | horse             |
| PSU-0535 | CFSAN079498 | SRR7135621 | chicken           |
| PSU-0536 | CFSAN079499 | SRR7135395 | chicken           |

|          |             |            |                      |
|----------|-------------|------------|----------------------|
| PSU-0537 | CFSAN079500 | SRR7135415 | cow                  |
| PSU-0538 | CFSAN079501 | SRR6985914 | water                |
| PSU-0539 | CFSAN079502 | SRR7135197 | water                |
| PSU-0540 | CFSAN079503 | SRR6986346 | water                |
| PSU-0541 | CFSAN079504 | SRR6985924 | water                |
| PSU-0542 | CFSAN079505 | SRR6986366 | water                |
| PSU-0543 | CFSAN079506 | SRR6985925 | water                |
| PSU-0544 | CFSAN079507 | SRR7135449 | water                |
| PSU-0545 | CFSAN079508 | SRR7135418 | water                |
| PSU-0546 | CFSAN079509 | SRR7135444 | water                |
| PSU-0547 | CFSAN079510 | SRR7135446 | water                |
| PSU-0548 | CFSAN079511 | SRR7135619 | Turkey, (Avian)      |
| PSU-0549 | CFSAN079512 | SRR7135398 | Turkey, (Avian)      |
| PSU-0550 | CFSAN079513 | SRR7135198 | Turkey, (Avian)      |
| PSU-0551 | CFSAN079514 | SRR7135419 | Turkey, (Avian)      |
| PSU-0552 | CFSAN079515 | SRR7135447 | Turkey, (Avian)      |
| PSU-0553 | CFSAN079516 | SRR7135440 | Turkey, (Avian)      |
| PSU-0554 | CFSAN079517 | SRR7135445 | Turkey, (Avian)      |
| PSU-0555 | CFSAN079518 | SRR6985834 | Turkey, (Avian)      |
| PSU-0556 | CFSAN079519 | SRR6986349 | Turkey, (Avian)      |
| PSU-0557 | CFSAN079520 | SRR6985926 | Turkey, (Avian)      |
| PSU-0558 | CFSAN079521 | SRR6985923 | Turkey, (Avian)      |
| PSU-0559 | CFSAN079522 | SRR6985890 | Turkey, (Avian)      |
| PSU-0560 | CFSAN079523 | SRR6986347 | Turkey, (Avian)      |
| PSU-0561 | CFSAN079524 | SRR6985859 | Turkey, (Avian)      |
| PSU-0562 | CFSAN079525 | SRR7012002 | Turkey, (Avian)      |
| PSU-0563 | CFSAN079526 | SRR7011994 | Turkey, (Avian)      |
| PSU-0564 | CFSAN079527 | SRR7011955 | Turkey, (Avian)      |
| PSU-0565 | CFSAN079528 | SRR7012117 | Mink                 |
| PSU-0566 | CFSAN079529 | SRR7011946 | Mink                 |
| PSU-0567 | CFSAN079530 | SRR7011506 | food                 |
| PSU-0568 | CFSAN079531 | SRR7010901 | Food, Dairy Products |
| PSU-0569 | CFSAN079532 | SRR7011047 | Food, Dairy Products |
| PSU-0570 | CFSAN079533 | SRR7010927 | Food, Dairy Products |
| PSU-0571 | CFSAN079534 | SRR7010950 | Pig, (Porcine)       |
| PSU-0572 | CFSAN079535 | SRR7011192 | Pig, (Porcine)       |
| PSU-0573 | CFSAN079536 | SRR7011026 | Klipspringer         |
| PSU-0575 | CFSAN079538 | SRR7010476 | Food, Vegetable      |
| PSU-0576 | CFSAN079539 | SRR7010318 | Food, Vegetable      |
| PSU-0577 | CFSAN079540 | SRR7135417 | Food, Vegetable      |
| PSU-0578 | CFSAN079541 | SRR7135490 | Horse, (Equine)      |
| PSU-0579 | CFSAN079542 | SRR7012237 | Marmoset             |
| PSU-0580 | CFSAN079543 | SRR7135402 | Pig, (Porcine)       |
| PSU-0581 | CFSAN079544 | SRR7135403 | Pig, (Porcine)       |
| PSU-0582 | CFSAN079545 | SRR7135200 | Pig, (Porcine)       |
| PSU-0583 | CFSAN079546 | SRR7135199 | Food, Dairy Products |
| PSU-0584 | CFSAN079547 | SRR7135396 | Food, Dairy Products |
| PSU-0585 | CFSAN079548 | SRR7010289 | Dog, (Canine)        |
| PSU-0601 | CFSAN079774 | SRR7042103 | Lemur, Madagascar    |
| PSU-0602 | CFSAN079775 | SRR7042094 | Lemur, Madagascar    |
| PSU-0603 | CFSAN079776 | SRR7042101 | Turkey, (Avian)      |
| PSU-0604 | CFSAN079777 | SRR7042064 | Turkey, (Avian)      |
| PSU-0605 | CFSAN079778 | SRR7042065 | Turkey, (Avian)      |

|          |             |            |                  |
|----------|-------------|------------|------------------|
| PSU-0606 | CFSAN079779 | SRR7042047 | Deer, Whitetail  |
| PSU-0607 | CFSAN079780 | SRR7042024 | Dog, (Canine)    |
| PSU-0608 | CFSAN079781 | SRR7042029 | Dog, (Canine)    |
| PSU-0609 | CFSAN079782 | SRR7042030 | Dog, (Canine)    |
| PSU-0610 | CFSAN079783 | SRR7042056 | Dog, (Canine)    |
| PSU-0611 | CFSAN079784 | SRR7041753 | Dog, (Canine)    |
| PSU-0612 | CFSAN079785 | SRR7041752 | Dog, (Canine)    |
| PSU-0613 | CFSAN079786 | SRR7042020 | Dog, (Canine)    |
| PSU-0614 | CFSAN079787 | SRR7041895 | Food, Cider      |
| PSU-0615 | CFSAN079788 | SRR7041903 | Food, Cider      |
| PSU-0616 | CFSAN079789 | SRR7041866 | Food, Cider      |
| PSU-0617 | CFSAN079790 | SRR7041865 | Food, Cider      |
| PSU-0618 | CFSAN079791 | SRR7041736 | Food, Cider      |
| PSU-0619 | CFSAN079792 | SRR7041750 | Chicken, (Avian) |
| PSU-0620 | CFSAN079793 | SRR7040547 | Chicken, (Avian) |
| PSU-0621 | CFSAN079794 | SRR7041735 | Chicken, (Avian) |
| PSU-0623 | CFSAN079796 | SRR7041705 | Chicken, (Avian) |
| PSU-0624 | CFSAN079797 | SRR7041623 | Llama            |
| PSU-0625 | CFSAN080232 | SRR7064623 | Horse, (Equine)  |
| PSU-0626 | CFSAN080233 | SRR7064601 | Pig, (Porcine)   |
| PSU-0627 | CFSAN080234 | SRR7064604 | food             |
| PSU-0628 | CFSAN080235 | SRR7066517 | Cow, (Bovine)    |
| PSU-0629 | CFSAN080236 | SRR7066519 | Cow, (Bovine)    |
| PSU-0630 | CFSAN080237 | SRR7066514 | Cow, (Bovine)    |
| PSU-0631 | CFSAN080238 | SRR7066518 | Cow, (Bovine)    |
| PSU-0632 | CFSAN080239 | SRR7066513 | Cow, (Bovine)    |
| PSU-0633 | CFSAN080240 | SRR7066516 | Cow, (Bovine)    |
| PSU-0634 | CFSAN080241 | SRR7064598 | Cow, (Bovine)    |
| PSU-0635 | CFSAN080242 | SRR7064600 | Chicken, (Avian) |
| PSU-0636 | CFSAN080243 | SRR7066512 | Chicken, (Avian) |
| PSU-0637 | CFSAN080244 | SRR7066521 | Chicken, (Avian) |
| PSU-0639 | CFSAN080246 | SRR7065978 | Chicken, (Avian) |
| PSU-0640 | CFSAN080247 | SRR7066534 | Chicken, (Avian) |
| PSU-0641 | CFSAN080248 | SRR7066573 | Chicken, (Avian) |
| PSU-0642 | CFSAN080249 | SRR7066542 | Chicken, (Avian) |
| PSU-0643 | CFSAN080250 | SRR7066504 | Cow, (Bovine)    |
| PSU-0644 | CFSAN080251 | SRR7066540 | Sheep, (Ovine)   |
| PSU-0645 | CFSAN080252 | SRR7066571 | Horse, (Equine)  |
| PSU-0646 | CFSAN080253 | SRR7064562 | Prairie Dog      |
| PSU-0647 | CFSAN080254 | SRR7066528 | Pig, (Porcine)   |
| PSU-0648 | CFSAN080255 | SRR7064578 | Pig, (Porcine)   |
| PSU-0649 | CFSAN080256 | SRR7065008 | Cow, (Bovine)    |
| PSU-0650 | CFSAN080257 | SRR7065787 | Cow, (Bovine)    |
| PSU-0651 | CFSAN080258 | SRR7065774 | Cow, (Bovine)    |
| PSU-0652 | CFSAN080259 | SRR7065788 | Cow, (Bovine)    |
| PSU-0653 | CFSAN080260 | SRR7065430 | Cow, (Bovine)    |
| PSU-0654 | CFSAN080261 | SRR7065749 | Cow, (Bovine)    |
| PSU-0655 | CFSAN080262 | SRR7066501 | Cow, (Bovine)    |
| PSU-0656 | CFSAN080263 | SRR7066508 | Cow, (Bovine)    |
| PSU-0657 | CFSAN080264 | SRR7065404 | Cow, (Bovine)    |
| PSU-0658 | CFSAN080265 | SRR7066498 | Cow, (Bovine)    |
| PSU-0659 | CFSAN080266 | SRR7065389 | Cow, (Bovine)    |
| PSU-0660 | CFSAN080267 | SRR7064619 | Cow, (Bovine)    |

|          |             |            |                       |
|----------|-------------|------------|-----------------------|
| PSU-0661 | CFSAN080268 | SRR7064574 | Cow, (Bovine)         |
| PSU-0662 | CFSAN080269 | SRR7064576 | Ostrich               |
| PSU-0663 | CFSAN080270 | SRR7064564 | Okapi                 |
| PSU-0664 | CFSAN080271 | SRR7064565 | Pig, (Porcine)        |
| PSU-0665 | CFSAN080272 | SRR7066529 | water                 |
| PSU-0666 | CFSAN080273 | SRR7064468 | water                 |
| PSU-0667 | CFSAN080274 | SRR7064469 | water                 |
| PSU-0668 | CFSAN080275 | SRR7064570 | water                 |
| PSU-0669 | CFSAN080276 | SRR7064572 | water                 |
| PSU-0670 | CFSAN080277 | SRR7064471 | water                 |
| PSU-0671 | CFSAN080278 | SRR7064557 | water                 |
| PSU-0672 | CFSAN080279 | SRR7064554 | water                 |
| PSU-0673 | CFSAN080280 | SRR7085307 | Antelope, Eland       |
| PSU-0674 | CFSAN080281 | SRR7085276 | Klipspringer          |
| PSU-0675 | CFSAN080282 | SRR7085316 | water                 |
| PSU-0676 | CFSAN080283 | SRR7085292 | water                 |
| PSU-0677 | CFSAN080284 | SRR7085308 | water                 |
| PSU-0678 | CFSAN080285 | SRR7085315 | water                 |
| PSU-0679 | CFSAN080286 | SRR7085285 | water                 |
| PSU-0680 | CFSAN080287 | SRR7085310 | water                 |
| PSU-0681 | CFSAN080288 | SRR7085296 | water                 |
| PSU-0682 | CFSAN080289 | SRR7085291 | Dog, (Canine)         |
| PSU-0683 | CFSAN080290 | SRR7085317 | Environment           |
| PSU-0684 | CFSAN080291 | SRR7085279 | Environment           |
| PSU-0685 | CFSAN080292 | SRR7085283 | Mouse                 |
| PSU-0686 | CFSAN080293 | SRR7084924 | Dog, (Canine)         |
| PSU-0687 | CFSAN080294 | SRR7084922 | Mouse                 |
| PSU-0688 | CFSAN080295 | SRR7085318 | Mouse                 |
| PSU-0689 | CFSAN080296 | SRR7085324 | Dolphin               |
| PSU-0690 | CFSAN080297 | SRR7084884 | Goat, (Caprine)       |
| PSU-0691 | CFSAN080298 | SRR7084909 | Horse, (Equine)       |
| PSU-0692 | CFSAN080299 | SRR7084913 | Environment           |
| PSU-0693 | CFSAN080300 | SRR7084925 | Whale                 |
| PSU-0694 | CFSAN080301 | SRR7085311 | Mouse                 |
| PSU-0695 | CFSAN080302 | SRR7085327 | Amphibians & reptiles |
| PSU-0696 | CFSAN080303 | SRR7085314 | Amphibians & reptiles |
| PSU-0697 | CFSAN082568 | SRR7414582 | water                 |
| PSU-0698 | CFSAN082569 | SRR7415406 | water                 |
| PSU-0699 | CFSAN082570 | SRR7500633 | water                 |
| PSU-0700 | CFSAN082571 | SRR7414164 | water                 |
| PSU-0701 | CFSAN082572 | SRR7500734 | water                 |
| PSU-0702 | CFSAN082573 | SRR7500731 | water                 |
| PSU-0703 | CFSAN082574 | SRR7500732 | water                 |
| PSU-0704 | CFSAN082575 | SRR7500668 | water                 |
| PSU-0705 | CFSAN082576 | SRR7500676 | water                 |
| PSU-0706 | CFSAN082577 | SRR7468875 | water                 |
| PSU-0707 | CFSAN082578 | SRR7468976 | Pig, (Porcine)        |
| PSU-0708 | CFSAN082579 | SRR8104590 | Deer, Whitetail       |
| PSU-0709 | CFSAN082580 | SRR7500638 | Food, Carrot          |
| PSU-0710 | CFSAN082581 | SRR7500678 | Horse, (Equine)       |
| PSU-0711 | CFSAN082582 | SRR7466965 | Gazelle, Curvier's    |
| PSU-0712 | CFSAN082583 | SRR7500674 | Antelope, Topi        |
| PSU-0713 | CFSAN082584 | SRR8104589 | Elk                   |

|          |             |            |                       |
|----------|-------------|------------|-----------------------|
| PSU-0714 | CFSAN082585 | SRR8104584 | Rabbit, Dom (Lampine) |
| PSU-0715 | CFSAN082586 | SRR7429964 | Cow, (Bovine)         |
| PSU-0716 | CFSAN082587 | SRR7430365 | Environment           |
| PSU-0717 | CFSAN082588 | SRR7429435 | Alpaca                |
| PSU-0718 | CFSAN082589 | SRR7429935 | Alpaca                |
| PSU-0719 | CFSAN082590 | SRR7500660 | Alpaca                |
| PSU-0720 | CFSAN082591 | SRR7500679 | Alpaca                |
| PSU-0721 | CFSAN082592 | SRR7466561 | Amphibians & reptiles |
| PSU-0722 | CFSAN082593 | SRR7500666 | Amphibians & reptiles |
| PSU-0723 | CFSAN082594 | SRR7428288 | Amphibians & reptiles |
| PSU-0724 | CFSAN082595 | SRR7427726 | Amphibians & reptiles |
| PSU-0725 | CFSAN082596 | SRR7427739 | Amphibians & reptiles |
| PSU-0726 | CFSAN082597 | SRR7427145 | Amphibians & reptiles |
| PSU-0727 | CFSAN082598 | SRR7427239 | Amphibians & reptiles |
| PSU-0728 | CFSAN082599 | SRR7427137 | Poultry               |
| PSU-0729 | CFSAN082600 | SRR7427139 | Poultry               |
| PSU-0730 | CFSAN082601 | SRR7427609 | Poultry               |
| PSU-0731 | CFSAN082602 | SRR7427608 | Poultry               |
| PSU-0732 | CFSAN082603 | SRR7427357 | Poultry               |
| PSU-0733 | CFSAN082604 | SRR7427612 | Poultry               |
| PSU-0734 | CFSAN082605 | SRR7500738 | Poultry               |
| PSU-0736 | CFSAN082607 | SRR8104580 | Poultry               |
| PSU-0737 | CFSAN082608 | SRR7415243 | Poultry               |
| PSU-0739 | CFSAN082610 | SRR8104484 | Poultry               |
| PSU-0740 | CFSAN082611 | SRR7500630 | Poultry               |
| PSU-0741 | CFSAN082612 | SRR8104472 | Poultry               |
| PSU-0742 | CFSAN082613 | SRR8104481 | Poultry               |
| PSU-0743 | CFSAN082614 | SRR8104475 | Poultry               |
| PSU-0744 | CFSAN082615 | SRR8104478 | Poultry               |
| PSU-0746 | CFSAN082617 | SRR8104485 | Poultry               |
| PSU-0747 | CFSAN082618 | SRR8104483 | Poultry               |
| PSU-0748 | CFSAN082619 | SRR7499310 | Poultry               |
| PSU-0749 | CFSAN082620 | SRR7499269 | Poultry               |
| PSU-0750 | CFSAN082621 | SRR7499279 | Poultry               |
| PSU-0751 | CFSAN082622 | SRR7497094 | Poultry               |
| PSU-0752 | CFSAN082623 | SRR7499285 | Poultry               |
| PSU-0753 | CFSAN082624 | SRR7497110 | Poultry               |
| PSU-0754 | CFSAN082625 | SRR7499266 | Capybaras             |
| PSU-0755 | CFSAN082626 | SRR7497098 | Cow, (Bovine)         |
| PSU-0756 | CFSAN082627 | SRR7499275 | Environment           |
| PSU-0757 | CFSAN082628 | SRR7499281 | Environment           |
| PSU-0758 | CFSAN082629 | SRR7499276 | Environment           |
| PSU-0759 | CFSAN082630 | SRR7499293 | Environment           |
| PSU-0760 | CFSAN082631 | SRR7499271 | Environment           |
| PSU-0761 | CFSAN082632 | SRR7499330 | Zebra                 |
| PSU-0762 | CFSAN082633 | SRR8104585 | Dog, (Canine)         |
| PSU-0762 | CFSAN082633 | SRR7656174 | Dog, (Canine)         |
| PSU-0763 | CFSAN082634 | SRR7499283 | Cow, (Bovine)         |
| PSU-0764 | CFSAN082635 | SRR8104583 | Goat, (Caprine)       |
| PSU-0764 | CFSAN082635 | SRR7656132 | Goat, (Caprine)       |
| PSU-0765 | CFSAN082636 | SRR8104588 | Cat, (Feline)         |
| PSU-0765 | CFSAN082636 | SRR7656127 | Cat, (Feline)         |
| PSU-0766 | CFSAN082637 | SRR7499284 | Cow, (Bovine)         |

|          |             |            |                         |
|----------|-------------|------------|-------------------------|
| PSU-0768 | CFSAN082639 | SRR8104591 | food                    |
| PSU-0769 | CFSAN083836 | SRR7613586 | Cow, (Bovine)           |
| PSU-0770 | CFSAN083837 | SRR7613740 | Cow, (Bovine)           |
| PSU-0771 | CFSAN083838 | SRR7613718 | food                    |
| PSU-0772 | CFSAN083839 | SRR7613722 | food                    |
| PSU-0773 | CFSAN083840 | SRR7613736 | Cow, (Bovine)           |
| PSU-0774 | CFSAN083841 | SRR7613730 | Cow, (Bovine)           |
| PSU-0775 | CFSAN083842 | SRR7613738 | food                    |
| PSU-0776 | CFSAN083843 | SRR7613638 | Cow, (Bovine)           |
| PSU-0777 | CFSAN083844 | SRR7613647 | Cow, (Bovine)           |
| PSU-0778 | CFSAN083845 | SRR7613716 | Cow, (Bovine)           |
| PSU-0779 | CFSAN083846 | SRR7613726 | Cow, (Bovine)           |
| PSU-0781 | CFSAN083848 | SRR7613723 | Environment             |
| PSU-0782 | CFSAN083849 | SRR7613633 | Steller's Eider         |
| PSU-0783 | CFSAN083850 | SRR7613643 | Steller's Eider         |
| PSU-0784 | CFSAN083851 | SRR7613629 | Steller's Eider         |
| PSU-0785 | CFSAN083852 | SRR7613622 | Deer, Whitetail         |
| PSU-0786 | CFSAN083853 | SRR7613729 | Camelid                 |
| PSU-0787 | CFSAN083854 | SRR7613732 | Cow, (Bovine)           |
| PSU-0788 | CFSAN083855 | SRR7613739 | Cow, (Bovine)           |
| PSU-0789 | CFSAN083856 | SRR7613733 | Cow, (Bovine)           |
| PSU-0790 | CFSAN083857 | SRR7613662 | Cow, (Bovine)           |
| PSU-0791 | CFSAN083858 | SRR7613654 | Cow, (Bovine)           |
| PSU-0792 | CFSAN083859 | SRR7613585 | Cow, (Bovine)           |
| PSU-0793 | CFSAN083860 | SRR7613612 | Dog, (Canine)           |
| PSU-0794 | CFSAN083861 | SRR7613572 | Pig, (Porcine)          |
| PSU-0795 | CFSAN083862 | SRR7613568 | Squirrel                |
| PSU-0796 | CFSAN083863 | SRR7613607 | Grain                   |
| PSU-0797 | CFSAN083864 | SRR7613567 | Pig, (Porcine)          |
| PSU-0798 | CFSAN083865 | SRR7613625 | food                    |
| PSU-0799 | CFSAN083866 | SRR7613593 | Food, Spinach           |
| PSU-0800 | CFSAN083867 | SRR7613611 | Avian                   |
| PSU-0801 | CFSAN083868 | SRR7613596 | Food, Lettuce - Romaine |
| PSU-0802 | CFSAN083869 | SRR7613573 | Cat, (Feline)           |
| PSU-0803 | CFSAN083870 | SRR7613605 | Deer, Whitetail         |
| PSU-0804 | CFSAN083871 | SRR7613604 | Cow, (Bovine)           |
| PSU-0805 | CFSAN083872 | SRR7613428 | Cow, (Bovine)           |
| PSU-0806 | CFSAN083873 | SRR7613561 | Feral Pig               |
| PSU-0807 | CFSAN083874 | SRR7613440 | Feral Pig               |
| PSU-0808 | CFSAN083875 | SRR7613652 | Feral Pig               |
| PSU-0809 | CFSAN083876 | SRR7613664 | Feral Pig               |
| PSU-0810 | CFSAN083877 | SRR7613668 | Avian                   |
| PSU-0811 | CFSAN083878 | SRR7613655 | Avian                   |
| PSU-0812 | CFSAN083879 | SRR7613731 | Avian                   |
| PSU-0813 | CFSAN083880 | SRR7613717 | Avian                   |
| PSU-0814 | CFSAN083881 | SRR7613721 | Goose, (Avian)          |
| PSU-0815 | CFSAN083882 | SRR7613724 | Leopard                 |
| PSU-0816 | CFSAN083883 | SRR7613727 | Mouse                   |
| PSU-0817 | CFSAN083884 | SRR7613720 | Calf                    |
| PSU-0818 | CFSAN083885 | SRR7613725 | Calf                    |
| PSU-0819 | CFSAN083886 | SRR7613620 | Calf                    |
| PSU-0820 | CFSAN083887 | SRR7613651 | Calf                    |
| PSU-0821 | CFSAN083888 | SRR7613650 | Calf                    |

|          |             |            |                  |
|----------|-------------|------------|------------------|
| PSU-0822 | CFSAN083889 | SRR7613657 | Calf             |
| PSU-0823 | CFSAN083890 | SRR7613661 | Calf             |
| PSU-0824 | CFSAN083891 | SRR7613665 | Calf             |
| PSU-0825 | CFSAN083892 | SRR7613653 | Calf             |
| PSU-0826 | CFSAN083893 | SRR7613663 | Calf             |
| PSU-0827 | CFSAN083894 | SRR7613646 | Calf             |
| PSU-0828 | CFSAN083895 | SRR7613640 | Calf             |
| PSU-0829 | CFSAN083896 | SRR7613666 | Calf             |
| PSU-0830 | CFSAN083897 | SRR7613584 | Calf             |
| PSU-0831 | CFSAN083898 | SRR7613569 | Calf             |
| PSU-0832 | CFSAN083899 | SRR7613609 | Calf             |
| PSU-0833 | CFSAN083900 | SRR7613659 | Calf             |
| PSU-0834 | CFSAN083901 | SRR7613667 | Calf             |
| PSU-0835 | CFSAN083902 | SRR7613631 | Gorilla          |
| PSU-0836 | CFSAN083903 | SRR7613660 | Gorilla          |
| PSU-0837 | CFSAN083904 | SRR7613656 | Gorilla          |
| PSU-0838 | CFSAN083905 | SRR7613602 | Gorilla          |
| PSU-0839 | CFSAN083906 | SRR7613583 | Spectacled Eider |
| PSU-0840 | CFSAN083907 | SRR7613574 | Spectacled Eider |
| PSU-0841 | CFSAN083908 | SRR7613566 | Spectacled Eider |
| PSU-0842 | CFSAN083909 | SRR7613728 | King Eider       |
| PSU-0843 | CFSAN083910 | SRR7613735 | King Eider       |
| PSU-0844 | CFSAN083911 | SRR7613632 | Spectacled Eider |
| PSU-0845 | CFSAN083912 | SRR7613635 | Avian            |
| PSU-0846 | CFSAN083913 | SRR7613623 | Spectacled Eider |
| PSU-0847 | CFSAN083914 | SRR7613436 | Spectacled Eider |
| PSU-0848 | CFSAN083915 | SRR7613734 | King Eider       |
| PSU-0849 | CFSAN083916 | SRR7613719 | King Eider       |
| PSU-0850 | CFSAN083917 | SRR7613588 | Common Eider     |
| PSU-0851 | CFSAN083918 | SRR7613587 | Common Eider     |
| PSU-0852 | CFSAN083919 | SRR7613581 | Common Eider     |
| PSU-0853 | CFSAN083920 | SRR7613580 | Common Eider     |
| PSU-0854 | CFSAN083921 | SRR7613617 | Dog, (Canine)    |
| PSU-0855 | CFSAN083922 | SRR7613610 | Cow, (Bovine)    |
| PSU-0856 | CFSAN083923 | SRR7613606 | Cow, (Bovine)    |
| PSU-0857 | CFSAN083924 | SRR7613578 | Cow, (Bovine)    |
| PSU-0858 | CFSAN083925 | SRR7613591 | Marmoset         |
| PSU-0859 | CFSAN083926 | SRR7613618 | Marmoset         |
| PSU-0860 | CFSAN083927 | SRR7613615 | Panda            |
| PSU-0861 | CFSAN083928 | SRR7613590 | Chicken, (Avian) |
| PSU-0862 | CFSAN083929 | SRR7613582 | Food, Spring mix |
| PSU-0863 | CFSAN083930 | SRR7613598 | Pig, (Porcine)   |
| PSU-0864 | CFSAN083931 | SRR7613658 | Pig, (Porcine)   |
| PSU-0865 | CFSAN085590 | SRR7786735 | duck             |
| PSU-0866 | CFSAN085591 | SRR7786730 | duck             |
| PSU-0867 | CFSAN085592 | SRR7786733 | duck             |
| PSU-0868 | CFSAN085593 | SRR7786739 | duck             |
| PSU-0869 | CFSAN085594 | SRR7786738 | cat              |
| PSU-0870 | CFSAN085595 | SRR7786729 | cat              |
| PSU-0871 | CFSAN085596 | SRR7786727 | Penguin          |
| PSU-0872 | CFSAN085597 | SRR7786658 | Steller's Eider  |
| PSU-0873 | CFSAN085598 | SRR7786660 | Steller's Eider  |
| PSU-0874 | CFSAN085599 | SRR7786652 | Steller's Eider  |



|          |             |            |                  |
|----------|-------------|------------|------------------|
| PSU-0875 | CFSAN085600 | SRR7786736 | Steller's Eider  |
| PSU-0876 | CFSAN085601 | SRR7786656 | Steller's Eider  |
| PSU-0877 | CFSAN085602 | SRR7786651 | Steller's Eider  |
| PSU-0878 | CFSAN085603 | SRR7786657 | Cow, (Bovine)    |
| PSU-0879 | CFSAN085604 | SRR7786655 | Raccoon          |
| PSU-0880 | CFSAN085605 | SRR7786662 | Okapi            |
| PSU-0881 | CFSAN085606 | SRR7786654 | Dog, (Canine)    |
| PSU-0882 | CFSAN085607 | SRR7786680 | Pig, (Porcine)   |
| PSU-0883 | CFSAN085608 | SRR7786690 | Pig, (Porcine)   |
| PSU-0884 | CFSAN085609 | SRR7786711 | Dog, (Canine)    |
| PSU-0890 | CFSAN085611 | SRR7788262 | Oyster           |
| PSU-0891 | CFSAN085612 | SRR7788251 | Oyster           |
| PSU-0892 | CFSAN085613 | SRR7788268 | Oyster           |
| PSU-0893 | CFSAN085614 | SRR7788264 | Oyster           |
| PSU-0894 | CFSAN085615 | SRR7788474 | Oyster           |
| PSU-0895 | CFSAN085616 | SRR7788483 | Oyster           |
| PSU-0896 | CFSAN085617 | SRR7788265 | Oyster           |
| PSU-0897 | CFSAN085618 | SRR7788259 | Oyster           |
| PSU-0898 | CFSAN085619 | SRR7788223 | Oyster           |
| PSU-0899 | CFSAN085620 | SRR7788246 | Oyster           |
| PSU-0900 | CFSAN085621 | SRR7788220 | Oyster           |
| PSU-0902 | CFSAN085623 | SRR7788261 | Oyster           |
| PSU-0903 | CFSAN085624 | SRR7788263 | Oyster           |
| PSU-0904 | CFSAN085625 | SRR7788252 | Oyster           |
| PSU-0905 | CFSAN085626 | SRR7788247 | Oyster           |
| PSU-0906 | CFSAN085627 | SRR7788248 | Oyster           |
| PSU-0907 | CFSAN085628 | SRR7788250 | Oyster           |
| PSU-0908 | CFSAN085629 | SRR7788244 | Oyster           |
| PSU-0909 | CFSAN085630 | SRR7788222 | Walrus           |
| PSU-0910 | CFSAN085631 | SRR7788257 | Mouse            |
| PSU-0912 | CFSAN078717 | SRR7690633 | Pig, (Porcine)   |
| PSU-0914 | CFSAN078719 | SRR7690505 | Cow, (Bovine)    |
| PSU-0915 | CFSAN078720 | SRR7690509 | Cow, (Bovine)    |
| PSU-0916 | CFSAN078721 | SRR7690499 | Cow, (Bovine)    |
| PSU-0917 | CFSAN078722 | SRR7690507 | Cow, (Bovine)    |
| PSU-0918 | CFSAN078723 | SRR7690626 | Cow, (Bovine)    |
| PSU-0919 | CFSAN078724 | SRR7690660 | Cow, (Bovine)    |
| PSU-0920 | CFSAN078725 | SRR7690668 | Cow, (Bovine)    |
| PSU-0921 | CFSAN078726 | SRR7690664 | Cow, (Bovine)    |
| PSU-1012 | CFSAN078814 | SRR8423918 | Chicken, (Avian) |
| PSU-1013 | CFSAN078815 | SRR8423790 | Chicken, (Avian) |
| PSU-1014 | CFSAN078816 | SRR8424026 | Chicken, (Avian) |
| PSU-1015 | CFSAN078817 | SRR8423925 | Chicken, (Avian) |
| PSU-1016 | CFSAN078818 | SRR8424021 | Chicken, (Avian) |
| PSU-1017 | CFSAN078819 | SRR8423788 | Chicken, (Avian) |
| PSU-1018 | CFSAN078820 | SRR8423789 | Chicken, (Avian) |
| PSU-1019 | CFSAN078821 | SRR8424022 | Chicken, (Avian) |
| PSU-1020 | CFSAN078822 | SRR8424018 | Chicken, (Avian) |
| PSU-1021 | CFSAN078823 | SRR8424019 | Chicken, (Avian) |
| PSU-1038 | CFSAN078840 | SRR8424024 | Cow, (Bovine)    |
| PSU-1039 | CFSAN078841 | SRR8424020 | Sheep, (Ovine)   |
| PSU-1040 | CFSAN078842 | SRR8423924 | Pig, (Porcine)   |
| PSU-1041 | CFSAN078843 | SRR8423923 | Cow, (Bovine)    |

|          |             |            |                         |
|----------|-------------|------------|-------------------------|
| PSU-1056 | CFSAN078858 | SRR8439560 | Food, Lettuce - Leaf    |
| PSU-1057 | CFSAN078859 | SRR8439552 | Food, Lettuce - Romaine |
| PSU-1058 | CFSAN078860 | SRR8439561 | Goose, (Avian)          |
| PSU-1059 | CFSAN078861 | SRR8439530 | Avian                   |
| PSU-1060 | CFSAN078862 | SRR8439522 | Cow, (Bovine)           |
| PSU-1061 | CFSAN078863 | SRR8439540 | Pig, (Porcine)          |
| PSU-1062 | CFSAN078864 | SRR8439562 | missing                 |
| PSU-1063 | CFSAN078865 | SRR8439806 | missing                 |
| PSU-1064 | CFSAN078866 | SRR8439567 | missing                 |
| PSU-1065 | CFSAN078867 | SRR8439533 | missing                 |
| PSU-1084 | CFSAN078886 | SRR8424025 | Pig, (Porcine)          |
| PSU-1085 | CFSAN078887 | SRR8439782 | Pig, (Porcine)          |
| PSU-1086 | CFSAN078888 | SRR8439823 | Pig, (Porcine)          |
| PSU-1087 | CFSAN078889 | SRR8439812 | Food, Celery            |
| PSU-1088 | CFSAN078890 | SRR8439785 | Food, Cantaloupe        |
| PSU-1089 | CFSAN078891 | SRR8439795 | Food, Cantaloupe        |
| PSU-1090 | CFSAN078892 | SRR8439799 | Food, Tomato            |
| PSU-1091 | CFSAN078893 | SRR8439783 | Cow, (Bovine)           |
| PSU-1092 | CFSAN078894 | SRR8439810 | Cow, (Bovine)           |
| PSU-1093 | CFSAN078895 | SRR8439777 | Cow, (Bovine)           |
| PSU-1094 | CFSAN078896 | SRR8439822 | Primate                 |
| PSU-1095 | CFSAN078897 | SRR8439763 | Primate                 |
| PSU-1096 | CFSAN078898 | SRR8439813 | Primate                 |
| PSU-1097 | CFSAN078899 | SRR8439811 | Food, Lettuce - Leaf    |
| PSU-1098 | CFSAN078900 | SRR8439660 | Food, Lettuce - Leaf    |
| PSU-1100 | CFSAN078902 | SRR8439807 | Food, Lettuce - Romaine |
| PSU-1101 | CFSAN078903 | SRR8439805 | Food, Cantaloupe        |
| PSU-1102 | CFSAN078904 | SRR8439808 | Food, Lettuce - Leaf    |
| PSU-1103 | CFSAN078905 | SRR8439535 | Food, Lettuce - Leaf    |
| PSU-1104 | CFSAN078906 | SRR8424016 | Food, Lettuce - Leaf    |
| PSU-1105 | CFSAN078907 | SRR8439668 | Food, Lettuce - Leaf    |
| PSU-1106 | CFSAN078908 | SRR8439767 | Food, Lettuce - Leaf    |
| PSU-1107 | CFSAN078909 | SRR8439791 | Food, Lettuce - Romaine |
| PSU-1108 | CFSAN078910 | SRR8439666 | Food, Lettuce - Romaine |
| PSU-1109 | CFSAN078911 | SRR8423780 | Food, Celery            |
| PSU-1110 | CFSAN078912 | SRR8439789 | Food, Lettuce - Romaine |
| PSU-1111 | CFSAN078913 | SRR8439665 | Food, Cantaloupe        |
| PSU-1112 | CFSAN078914 | SRR8423781 | Food, Lettuce - Leaf    |
| PSU-1121 | CFSAN078923 | SRR8439781 | Pig, (Porcine)          |
| PSU-1122 | CFSAN078924 | SRR8439779 | Cow, (Bovine)           |
| PSU-1123 | CFSAN078925 | SRR8439775 | Cow, (Bovine)           |
| PSU-1124 | CFSAN078926 | SRR8439787 | Cow, (Bovine)           |
| PSU-1125 | CFSAN078927 | SRR8439802 | Cow, (Bovine)           |
| PSU-1126 | CFSAN078928 | SRR8439774 | Cow, (Bovine)           |
| PSU-1179 | CFSAN085642 | SRR7786689 | Pig, (Porcine)          |
| PSU-1181 | CFSAN085643 | SRR7786659 | Pig, (Porcine)          |
| PSU-1184 | CFSAN085646 | SRR7786605 | Pig, (Porcine)          |
| PSU-1185 | CFSAN085647 | SRR7786691 | Pig, (Porcine)          |
| PSU-1187 | CFSAN085648 | SRR7786602 | Cow, (Bovine)           |
| PSU-1194 | CFSAN085654 | SRR7786745 | Avian                   |
| PSU-1195 | CFSAN085655 | SRR7786743 | Avian                   |
| PSU-1196 | CFSAN085656 | SRR7786672 | Pig, (Porcine)          |
| PSU-1197 | CFSAN085657 | SRR7786734 | Pig, (Porcine)          |

|          |             |            |                         |
|----------|-------------|------------|-------------------------|
| PSU-1199 | CFSAN085658 | SRR7786682 | Food, Lettuce - Romaine |
| PSU-1233 | CFSAN085769 | SRR7871400 | Cow, (Bovine)           |
| PSU-1234 | CFSAN085770 | SRR7871410 | Cow, (Bovine)           |
| PSU-1235 | CFSAN085771 | SRR7871409 | Pig, (Porcine)          |
| PSU-1236 | CFSAN085772 | SRR7870877 | Cow, (Bovine)           |
| PSU-1237 | CFSAN085773 | SRR7870881 | Cow, (Bovine)           |
| PSU-1238 | CFSAN085774 | SRR7870885 | Cow, (Bovine)           |
| PSU-1239 | CFSAN085775 | SRR7870883 | Cow, (Bovine)           |
| PSU-1240 | CFSAN085776 | SRR7870882 | Pig, (Porcine)          |
| PSU-1241 | CFSAN085777 | SRR7870875 | Cow, (Bovine)           |
| PSU-1242 | CFSAN085778 | SRR7870876 | Cow, (Bovine)           |
| PSU-1243 | CFSAN085779 | SRR7870884 | Cow, (Bovine)           |
| PSU-1244 | CFSAN085780 | SRR7870880 | Cow, (Bovine)           |
| PSU-1245 | CFSAN085781 | SRR7870878 | Cow, (Bovine)           |
| PSU-1246 | CFSAN085782 | SRR7869668 | Cow, (Bovine)           |
| PSU-1247 | CFSAN085783 | SRR7870863 | Pig, (Porcine)          |
| PSU-1248 | CFSAN085784 | SRR7870869 | Cow, (Bovine)           |
| PSU-1249 | CFSAN085785 | SRR7870866 | Cow, (Bovine)           |
| PSU-1251 | CFSAN085787 | SRR7870872 | Pig, (Porcine)          |
| PSU-1252 | CFSAN085788 | SRR7870865 | Buffalo                 |
| PSU-1253 | CFSAN085789 | SRR7869667 | Buffalo                 |
| PSU-1255 | CFSAN085791 | SRR7869666 | Pig, (Porcine)          |
| PSU-1256 | CFSAN085792 | SRR7871388 | Pig, (Porcine)          |
| PSU-1257 | CFSAN085793 | SRR7871403 | Pig, (Porcine)          |
| PSU-1258 | CFSAN085794 | SRR7871390 | Pig, (Porcine)          |
| PSU-1259 | CFSAN085795 | SRR7871391 | Pig, (Porcine)          |
| PSU-1260 | CFSAN085796 | SRR7871487 | Pig, (Porcine)          |
| PSU-1261 | CFSAN085797 | SRR7871486 | Pig, (Porcine)          |
| PSU-1262 | CFSAN085798 | SRR7871489 | Pig, (Porcine)          |
| PSU-1263 | CFSAN085799 | SRR7871488 | Cow, (Bovine)           |
| PSU-1264 | CFSAN085800 | SRR7871397 | Cow, (Bovine)           |
| PSU-1265 | CFSAN085801 | SRR7871404 | Pig, (Porcine)          |
| PSU-1266 | CFSAN085802 | SRR7871402 | Pig, (Porcine)          |
| PSU-1267 | CFSAN085803 | SRR7871399 | Pig, (Porcine)          |
| PSU-1268 | CFSAN085804 | SRR7870879 | Pig, (Porcine)          |
| PSU-1269 | CFSAN085805 | SRR7889296 | Waste Water             |
| PSU-1270 | CFSAN085806 | SRR7889288 | Waste Water             |
| PSU-1272 | CFSAN085808 | SRR7889314 | Waste Water             |
| PSU-1273 | CFSAN085809 | SRR7889335 | Waste Water             |
| PSU-1274 | CFSAN085810 | SRR7889334 | Waste Water             |
| PSU-1275 | CFSAN085811 | SRR7889287 | Waste Water             |
| PSU-1276 | CFSAN085812 | SRR7889291 | Waste Water             |
| PSU-1277 | CFSAN085813 | SRR7889293 | Waste Water             |
| PSU-1278 | CFSAN085814 | SRR7889376 | Waste Water             |
| PSU-1279 | CFSAN085815 | SRR7889318 | Waste Water             |
| PSU-1280 | CFSAN085816 | SRR7889381 | Waste Water             |
| PSU-1281 | CFSAN085817 | SRR7889310 | Waste Water             |
| PSU-1282 | CFSAN085818 | SRR7889364 | Waste Water             |
| PSU-1283 | CFSAN085819 | SRR7889350 | Waste Water             |
| PSU-1284 | CFSAN085820 | SRR7889304 | Waste Water             |
| PSU-1285 | CFSAN085821 | SRR7889222 | Waste Water             |
| PSU-1286 | CFSAN085822 | SRR7889295 | Waste Water             |
| PSU-1287 | CFSAN085823 | SRR7889223 | Waste Water             |

|          |             |            |                       |
|----------|-------------|------------|-----------------------|
| PSU-1288 | CFSAN085824 | SRR7889226 | Waste Water           |
| PSU-1289 | CFSAN085825 | SRR7889221 | Waste Water           |
| PSU-1290 | CFSAN085826 | SRR7889224 | Waste Water           |
| PSU-1291 | CFSAN085827 | SRR7889320 | Waste Water           |
| PSU-1293 | CFSAN085829 | SRR7889342 | Waste Water           |
| PSU-1294 | CFSAN085830 | SRR7889321 | Waste Water           |
| PSU-1295 | CFSAN085831 | SRR7889325 | Waste Water           |
| PSU-1296 | CFSAN085832 | SRR7889294 | Waste Water           |
| PSU-1297 | CFSAN085833 | SRR7889292 | Waste Water           |
| PSU-1298 | CFSAN085834 | SRR7889290 | Waste Water           |
| PSU-1299 | CFSAN085835 | SRR7889289 | Waste Water           |
| PSU-1300 | CFSAN085836 | SRR7889353 | Waste Water           |
| PSU-1301 | CFSAN085837 | SRR7904911 | Waste Water           |
| PSU-1302 | CFSAN085838 | SRR7904924 | Waste Water           |
| PSU-1303 | CFSAN085839 | SRR7904917 | Waste Water           |
| PSU-1304 | CFSAN085840 | SRR7904908 | Waste Water           |
| PSU-1305 | CFSAN085841 | SRR7904967 | Waste Water           |
| PSU-1306 | CFSAN085842 | SRR7904983 | Waste Water           |
| PSU-1307 | CFSAN085843 | SRR7904984 | Waste Water           |
| PSU-1308 | CFSAN085844 | SRR7904907 | Waste Water           |
| PSU-1309 | CFSAN085845 | SRR7904931 | Waste Water           |
| PSU-1310 | CFSAN085846 | SRR7904918 | Waste Water           |
| PSU-1311 | CFSAN085847 | SRR7904913 | Waste Water           |
| PSU-1312 | CFSAN085848 | SRR7904914 | Waste Water           |
| PSU-1313 | CFSAN085849 | SRR7904922 | Waste Water           |
| PSU-1314 | CFSAN085850 | SRR7904968 | Waste Water           |
| PSU-1315 | CFSAN085851 | SRR7904915 | Waste Water           |
| PSU-1316 | CFSAN085852 | SRR7904963 | Waste Water           |
| PSU-1317 | CFSAN085853 | SRR7904965 | Waste Water           |
| PSU-1318 | CFSAN085854 | SRR7906768 | Waste Water           |
| PSU-1319 | CFSAN085855 | SRR7906747 | Waste Water           |
| PSU-1320 | CFSAN085856 | SRR7905017 | Waste Water           |
| PSU-1321 | CFSAN085857 | SRR7906771 | Waste Water           |
| PSU-1322 | CFSAN085858 | SRR7905454 | Waste Water           |
| PSU-1323 | CFSAN085859 | SRR7905032 | Waste Water           |
| PSU-1324 | CFSAN085860 | SRR7904964 | Waste Water           |
| PSU-1325 | CFSAN085861 | SRR7904982 | Waste Water           |
| PSU-1326 | CFSAN085862 | SRR7904910 | Waste Water           |
| PSU-1327 | CFSAN085863 | SRR7904909 | Waste Water           |
| PSU-1328 | CFSAN085864 | SRR7904912 | Waste Water           |
| PSU-1329 | CFSAN085865 | SRR7904927 | Waste Water           |
| PSU-1330 | CFSAN085866 | SRR7904921 | Waste Water           |
| PSU-1331 | CFSAN085867 | SRR7904928 | Waste Water           |
| PSU-1332 | CFSAN085868 | SRR7904925 | Waste Water           |
| PSU-1441 | CFSAN086933 | SRR8112696 | Chicken, (Avian)      |
| PSU-1442 | CFSAN086934 | SRR8112692 | Chicken, (Avian)      |
| PSU-1443 | CFSAN086935 | SRR8112802 | Antelope, Oryx        |
| PSU-1444 | CFSAN086936 | SRR8112804 | Rabbit, Dom (Lampine) |
| PSU-1445 | CFSAN086937 | SRR8112796 | Rabbit, Dom (Lampine) |
| PSU-1446 | CFSAN086938 | SRR8112798 | Rabbit, Dom (Lampine) |
| PSU-1447 | CFSAN086939 | SRR8112801 | Rabbit, Dom (Lampine) |
| PSU-1448 | CFSAN086940 | SRR8112687 | Chicken, (Avian)      |
| PSU-1449 | CFSAN086941 | SRR8112690 | Chicken, (Avian)      |

|          |             |            |                  |
|----------|-------------|------------|------------------|
| PSU-1450 | CFSAN086942 | SRR8112693 | Chicken, (Avian) |
| PSU-1451 | CFSAN086943 | SRR8112799 | Horse, (Equine)  |
| PSU-1452 | CFSAN086944 | SRR8112805 | Horse, (Equine)  |
| PSU-1453 | CFSAN086945 | SRR8112697 | Horse, (Equine)  |
| PSU-1454 | CFSAN086946 | SRR8112691 | Horse, (Equine)  |
| PSU-1455 | CFSAN086947 | SRR8112694 | Llama            |
| PSU-1456 | CFSAN086948 | SRR8112698 | Caribou          |
| PSU-1457 | CFSAN086949 | SRR8112689 | Caribou          |
| PSU-1458 | CFSAN086950 | SRR8112699 | Horse, (Equine)  |
| PSU-1459 | CFSAN086951 | SRR8112792 | Turkey, (Avian)  |
| PSU-1460 | CFSAN086952 | SRR8112924 | Turkey, (Avian)  |
| PSU-1461 | CFSAN086953 | SRR8112927 | Turkey, (Avian)  |
| PSU-1462 | CFSAN086954 | SRR8112822 | Turkey, (Avian)  |
| PSU-1463 | CFSAN086955 | SRR8112815 | Turkey, (Avian)  |
| PSU-1464 | CFSAN086956 | SRR8112810 | Turkey, (Avian)  |
| PSU-1465 | CFSAN086957 | SRR8112817 | Turkey, (Avian)  |
| PSU-1466 | CFSAN086958 | SRR8112921 | Turkey, (Avian)  |
| PSU-1467 | CFSAN086959 | SRR8112916 | Turkey, (Avian)  |
| PSU-1468 | CFSAN086960 | SRR8112929 | Turkey, (Avian)  |
| PSU-1469 | CFSAN086961 | SRR8112814 | Pig, (Porcine)   |
| PSU-1470 | CFSAN086962 | SRR8112820 | Turkey, (Avian)  |
| PSU-1471 | CFSAN086963 | SRR8112812 | Cow, (Bovine)    |
| PSU-1472 | CFSAN086964 | SRR8112809 | Dog, (Canine)    |
| PSU-1473 | CFSAN086965 | SRR8112926 | Dog, (Canine)    |
| PSU-1474 | CFSAN086966 | SRR8112825 | Dog, (Canine)    |
| PSU-1475 | CFSAN086967 | SRR8112816 | Dog, (Canine)    |
| PSU-1476 | CFSAN086968 | SRR8112819 | Dog, (Canine)    |
| PSU-1477 | CFSAN086969 | SRR8112807 | Chicken, (Avian) |
| PSU-1478 | CFSAN086970 | SRR8112821 | Cat, (Feline)    |
| PSU-1479 | CFSAN086971 | SRR8112823 | Chicken, (Avian) |
| PSU-1480 | CFSAN086972 | SRR8112818 | Chicken, (Avian) |
| PSU-1481 | CFSAN086973 | SRR8112813 | Chicken, (Avian) |
| PSU-1482 | CFSAN086974 | SRR8112811 | Chicken, (Avian) |
| PSU-1483 | CFSAN086975 | SRR8112931 | Chicken, (Avian) |
| PSU-1484 | CFSAN086976 | SRR8112836 | Chicken, (Avian) |
| PSU-1485 | CFSAN086977 | SRR8112923 | Chicken, (Avian) |
| PSU-1486 | CFSAN086978 | SRR8112824 | Chicken, (Avian) |
| PSU-1487 | CFSAN086979 | SRR8112837 | Chicken, (Avian) |
| PSU-1488 | CFSAN086980 | SRR8112829 | Chicken, (Avian) |
| PSU-1489 | CFSAN086981 | SRR8112826 | Cow, (Bovine)    |
| PSU-1490 | CFSAN086982 | SRR8112932 | Cow, (Bovine)    |
| PSU-1491 | CFSAN086983 | SRR8112918 | Cow, (Bovine)    |
| PSU-1492 | CFSAN086984 | SRR8112831 | Cow, (Bovine)    |
| PSU-1493 | CFSAN086985 | SRR8112915 | Cow, (Bovine)    |
| PSU-1494 | CFSAN086986 | SRR8112920 | Cow, (Bovine)    |
| PSU-1495 | CFSAN086987 | SRR8112838 | Sheep, (Ovine)   |
| PSU-1496 | CFSAN086988 | SRR8112839 | Pig, (Porcine)   |
| PSU-1497 | CFSAN086989 | SRR8112828 | Pig, (Porcine)   |
| PSU-1498 | CFSAN086990 | SRR8112832 | Goat, (Caprine)  |
| PSU-1499 | CFSAN086991 | SRR8112835 | Goat, (Caprine)  |
| PSU-1500 | CFSAN086992 | SRR8112930 | Goat, (Caprine)  |
| PSU-1501 | CFSAN086993 | SRR8112827 | Pig, (Porcine)   |
| PSU-1502 | CFSAN086994 | SRR8112830 | Ostrich          |

|          |             |            |                                         |
|----------|-------------|------------|-----------------------------------------|
| PSU-1503 | CFSAN086995 | SRR8112922 | Pig, (Porcine)                          |
| PSU-1504 | CFSAN086996 | SRR8112919 | Pig, (Porcine)                          |
| PSU-1505 | CFSAN086997 | SRR8112925 | Pig, (Porcine)                          |
| PSU-1506 | CFSAN086998 | SRR8112914 | Cow, (Bovine)                           |
| PSU-1507 | CFSAN086999 | SRR8112917 | Cow, (Bovine)                           |
| PSU-1508 | CFSAN087000 | SRR8112928 | Cow, (Bovine)                           |
| PSU-1509 | CFSAN087001 | SRR8112808 | Cow, (Bovine)                           |
| PSU-1510 | CFSAN087002 | SRR8140259 | Rhesus Macaque                          |
| PSU-1511 | CFSAN087003 | SRR8140254 | Pig, (Porcine)                          |
| PSU-1512 | CFSAN087004 | SRR8140260 | Pig, (Porcine)                          |
| PSU-1513 | CFSAN087005 | SRR8140205 | Food, Lettuce - Leaf                    |
| PSU-1514 | CFSAN087006 | SRR8140261 | Food, Lettuce - Romaine                 |
| PSU-1515 | CFSAN087007 | SRR8140264 | Food, Lettuce - Leaf                    |
| PSU-1516 | CFSAN087008 | SRR8140248 | Food, Lettuce - Leaf                    |
| PSU-1517 | CFSAN087009 | SRR8140244 | Okapi                                   |
| PSU-1518 | CFSAN087010 | SRR8140266 | Turkey, (Avian)                         |
| PSU-1519 | CFSAN087011 | SRR8140258 | Cow, (Bovine)                           |
| PSU-1520 | CFSAN087012 | SRR8140257 | water                                   |
| PSU-1521 | CFSAN087013 | SRR8140206 | Food, Lettuce - Romaine                 |
| PSU-1522 | CFSAN087014 | SRR8140229 | Food, Tomato                            |
| PSU-1523 | CFSAN087015 | SRR8140193 | Food, Lettuce - Leaf                    |
| PSU-1524 | CFSAN087016 | SRR8140204 | Environment                             |
| PSU-1525 | CFSAN087017 | SRR8140215 | Food, Spinach                           |
| PSU-1526 | CFSAN087018 | SRR8140203 | Food, Spinach                           |
| PSU-1527 | CFSAN087019 | SRR8140194 | Food, Spinach                           |
| PSU-1528 | CFSAN087020 | SRR8140249 | Food, Spinach                           |
| PSU-1529 | CFSAN087021 | SRR8140207 | Food, Sprouts                           |
| PSU-1530 | CFSAN087022 | SRR8140210 | Food, Spinach                           |
| PSU-1531 | CFSAN087023 | SRR8140214 | Food, Spinach                           |
| PSU-1532 | CFSAN087024 | SRR8140225 | Food, Spinach                           |
| PSU-1533 | CFSAN087025 | SRR8140255 | Food, Spinach                           |
| PSU-1534 | CFSAN087026 | SRR8140246 | Food, Spinach                           |
| PSU-1535 | CFSAN087027 | SRR8140241 | Food, Cilantro                          |
| PSU-1536 | CFSAN087028 | SRR8140234 | Food, Parsley                           |
| PSU-1537 | CFSAN087029 | SRR8140228 | Food, Cilantro                          |
| PSU-1541 | CFSAN087033 | SRR8140209 | Dairy processing environment - Floor    |
| PSU-1542 | CFSAN087034 | SRR8140251 | Dairy processing environment - Floor    |
| PSU-1543 | CFSAN087035 | SRR8140237 | Dairy processing environment - Squeegee |
| PSU-1544 | CFSAN087036 | SRR8140236 | Dairy processing environment - Floor    |
| PSU-1545 | CFSAN087037 | SRR8140245 | Dairy processing environment - Floor    |
| PSU-1546 | CFSAN087038 | SRR8140227 | Dairy processing environment - Squeegee |
| PSU-1547 | CFSAN087039 | SRR8140238 | cheese                                  |
| PSU-1548 | CFSAN087040 | SRR8140224 | cheese                                  |
| PSU-1549 | CFSAN087041 | SRR8140226 | milk                                    |
| PSU-1550 | CFSAN087042 | SRR8140212 | milk                                    |
| PSU-1551 | CFSAN087043 | SRR8140222 | Dairy processing environment - Floor    |

|          |             |            |                                             |
|----------|-------------|------------|---------------------------------------------|
| PSU-1552 | CFSAN087044 | SRR8140213 | Dairy processing environment - Floor        |
| PSU-1553 | CFSAN087045 | SRR8140243 | Dairy processing environment - Squeegee     |
| PSU-1554 | CFSAN087046 | SRR8140211 | Dairy processing environment - Plant boot   |
| PSU-1555 | CFSAN087047 | SRR8140242 | Dairy processing environment - Squeegee     |
| PSU-1556 | CFSAN087048 | SRR8140235 | Dairy processing environment - Plant boot   |
| PSU-1557 | CFSAN087049 | SRR8140208 | Dairy processing environment - Crate        |
| PSU-1558 | CFSAN087050 | SRR8140240 | cheese                                      |
| PSU-1560 | CFSAN087052 | SRR8140230 | milk                                        |
| PSU-1561 | CFSAN087053 | SRR8140239 | milk                                        |
| PSU-1562 | CFSAN087054 | SRR8140223 | Dairy processing environment - Plant boot   |
| PSU-1563 | CFSAN087055 | SRR8140262 | Dairy processing environment - Floor        |
| PSU-1564 | CFSAN087056 | SRR8140256 | Dairy processing environment - Floor        |
| PSU-1565 | CFSAN087057 | SRR8140250 | Dairy processing environment - Squeegee     |
| PSU-1566 | CFSAN087058 | SRR8140252 | Dairy processing environment - Cheese press |
| PSU-1567 | CFSAN087059 | SRR8140263 | cheese                                      |
| PSU-1568 | CFSAN087060 | SRR8140253 | milk                                        |
| PSU-1569 | CFSAN087061 | SRR8140265 | milk                                        |
| PSU-1570 | CFSAN087062 | SRR8140247 | Dairy processing environment - Cheese press |
| PSU-1701 | CFSAN088346 | SRR8397484 | Avian                                       |
| PSU-1702 | CFSAN088347 | SRR8397587 | cow                                         |
| PSU-1703 | CFSAN088348 | SRR8397480 | Rat                                         |
| PSU-1704 | CFSAN088349 | SRR8397610 | Rat                                         |
| PSU-1705 | CFSAN088350 | SRR8397584 | Primate                                     |
| PSU-1706 | CFSAN088351 | SRR8397547 | Primate                                     |
| PSU-1707 | CFSAN088352 | SRR8397582 | cow                                         |
| PSU-1708 | CFSAN088353 | SRR8397635 | Rat                                         |
| PSU-1709 | CFSAN088354 | SRR8397590 | Mouse                                       |
| PSU-1710 | CFSAN088355 | SRR8397612 | Primate                                     |
| PSU-1711 | CFSAN088356 | SRR8397618 | pig                                         |
| PSU-1712 | CFSAN088357 | SRR8397432 | cow                                         |
| PSU-1713 | CFSAN088358 | SRR8397624 | Rat                                         |
| PSU-1714 | CFSAN088359 | SRR8397614 | Rat                                         |
| PSU-1715 | CFSAN088360 | SRR8397691 | cow                                         |
| PSU-1716 | CFSAN088361 | SRR8397583 | pig                                         |
| PSU-1717 | CFSAN088362 | SRR8397616 | Rat                                         |
| PSU-1718 | CFSAN088363 | SRR8397621 | Rat                                         |
| PSU-1719 | CFSAN088364 | SRR8397429 | Rat                                         |
| PSU-1720 | CFSAN088365 | SRR8397611 | Rat                                         |
| PSU-1741 | CFSAN088386 | SRR8297586 | Poultry                                     |
| PSU-1742 | CFSAN088387 | SRR8297457 | Poultry                                     |

|          |             |            |                         |
|----------|-------------|------------|-------------------------|
| PSU-1743 | CFSAN088388 | SRR8297581 | Marmoset                |
| PSU-1745 | CFSAN088390 | SRR8297584 | dog                     |
| PSU-1746 | CFSAN088391 | SRR8297460 | dog                     |
| PSU-1747 | CFSAN088392 | SRR8297592 | cat                     |
| PSU-1748 | CFSAN088393 | SRR8297591 | cow                     |
| PSU-1749 | CFSAN088394 | SRR8297594 | cow                     |
| PSU-1750 | CFSAN088395 | SRR8297588 | cat                     |
| PSU-1751 | CFSAN088396 | SRR8297620 | cow                     |
| PSU-1752 | CFSAN088397 | SRR8297585 | cow                     |
| PSU-1754 | CFSAN088399 | SRR8297455 | cow                     |
| PSU-1756 | CFSAN088401 | SRR8297622 | cow                     |
| PSU-1757 | CFSAN088402 | SRR8297624 | Deer, Whitetail         |
| PSU-1758 | CFSAN088403 | SRR8297609 | Mink                    |
| PSU-1759 | CFSAN088404 | SRR8297583 | Deer, Whitetail         |
| PSU-1760 | CFSAN088405 | SRR8297605 | Deer, Whitetail         |
| PSU-1761 | CFSAN088406 | SRR8397692 | cow                     |
| PSU-1762 | CFSAN088407 | SRR8397517 | goose                   |
| PSU-1763 | CFSAN088408 | SRR8397548 | cow                     |
| PSU-1764 | CFSAN088409 | SRR8397533 | Guinea Pig              |
| PSU-1765 | CFSAN088410 | SRR8397523 | Rat                     |
| PSU-1766 | CFSAN088411 | SRR8397539 | Marmoset                |
| PSU-1767 | CFSAN088412 | SRR8397521 | Marmoset                |
| PSU-1768 | CFSAN088413 | SRR8397485 | Marmoset                |
| PSU-1769 | CFSAN088414 | SRR8297634 | Marmoset                |
| PSU-1770 | CFSAN088415 | SRR8297615 | Guinea Pig              |
| PSU-1771 | CFSAN088416 | SRR8297631 | Marmoset                |
| PSU-1772 | CFSAN088417 | SRR8297601 | Guinea Pig              |
| PSU-1773 | CFSAN088418 | SRR8297616 | Guinea Pig              |
| PSU-1774 | CFSAN088419 | SRR8297628 | Guinea Pig              |
| PSU-1775 | CFSAN088420 | SRR8297621 | Hedgehog                |
| PSU-1776 | CFSAN088421 | SRR8297626 | Hedgehog                |
| PSU-1777 | CFSAN088422 | SRR8297598 | Guinea Pig              |
| PSU-1778 | CFSAN088423 | SRR8297623 | Hedgehog                |
| PSU-1779 | CFSAN088424 | SRR8297630 | Hedgehog                |
| PSU-1780 | CFSAN088425 | SRR8297629 | Hedgehog                |
| PSU-1781 | CFSAN088426 | SRR8397441 | Guinea Pig              |
| PSU-1782 | CFSAN088427 | SRR8397696 | Environment             |
| PSU-1783 | CFSAN088428 | SRR8397529 | cow                     |
| PSU-1784 | CFSAN088429 | SRR8397446 | Capercaillie (Grouse)   |
| PSU-1786 | CFSAN088431 | SRR8397554 | chicken                 |
| PSU-1787 | CFSAN088432 | SRR8397427 | Avian                   |
| PSU-1789 | CFSAN088434 | SRR8397608 | cow                     |
| PSU-1790 | CFSAN088435 | SRR8397689 | soil                    |
| PSU-1791 | CFSAN088436 | SRR8397609 | soil                    |
| PSU-1792 | CFSAN088437 | SRR8397481 | pig                     |
| PSU-1793 | CFSAN088438 | SRR8397470 | water                   |
| PSU-1794 | CFSAN088439 | SRR8397538 | water                   |
| PSU-1795 | CFSAN088440 | SRR8397633 | Food, Lettuce - Iceberg |
| PSU-1796 | CFSAN088441 | SRR8397630 | Food, Ice Cream         |
| PSU-1797 | CFSAN088442 | SRR8397695 | Guinea Pig              |
| PSU-1798 | CFSAN088443 | SRR8397488 | cow                     |
| PSU-1799 | CFSAN088444 | SRR8397700 | Ferret                  |



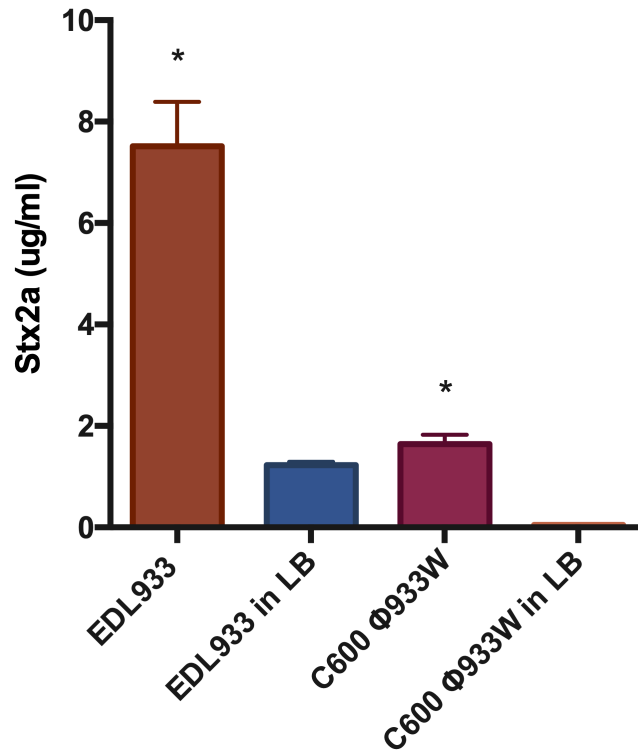

Fig. S1: EDL933 and C600 carrying φ933W were grown in 0.1229 cell-free supernatant, or in LB as indicated. One-way ANOVA was used and levels marked with an asterisk were significantly higher than respective LB control (Dunnett's test,  $p < 0.05$ ).

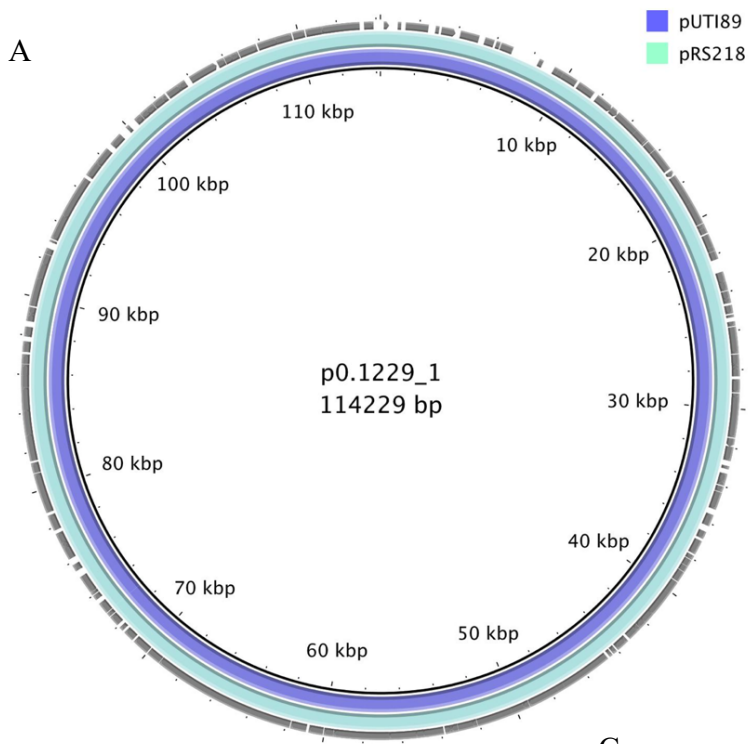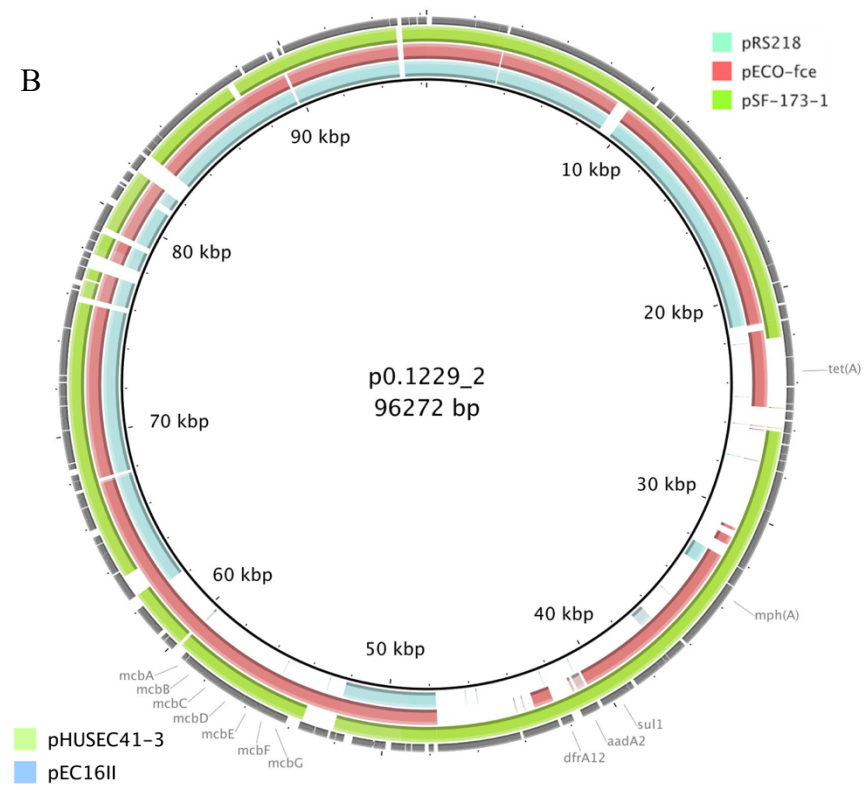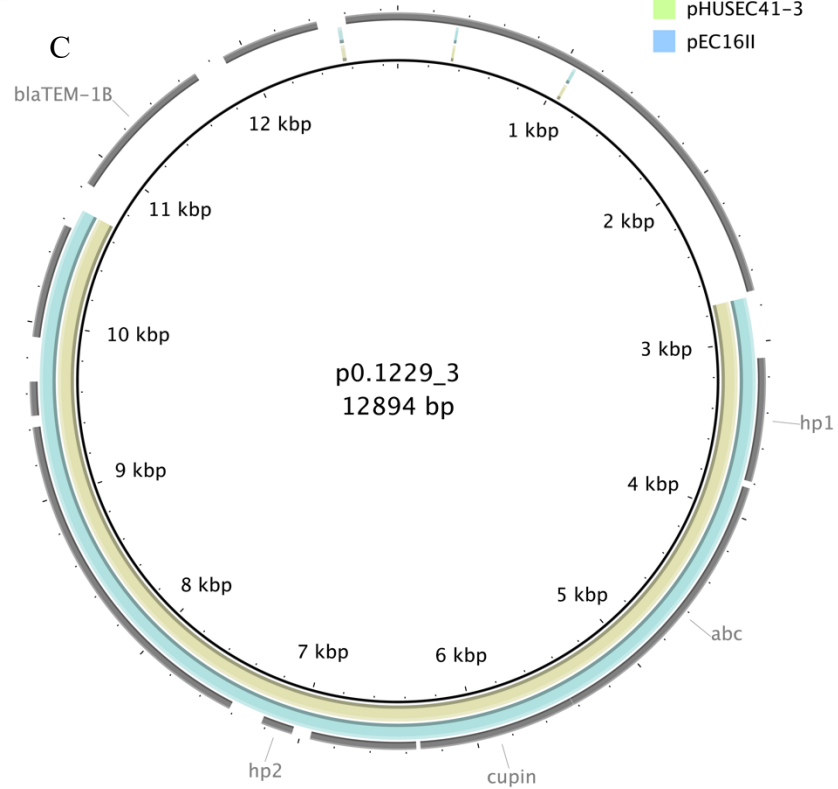

Fig. S2: Plasmid comparisons of individual 0.1229 plasmids and publicly available plasmids from NCBI by BLAST and visualized with BRIG. The colored rings indicate sequence similarity and the outer grey ring denotes annotated ORFs. The MccB17 operon is labeled *mcbA-mcbG*, and five antimicrobial resistance genes, macrolide (*mph(A)*), tetracycline (*tet(A)*), sulphonamide (*sul1*), aminoglycoside (*aadA2*), and trimethoprim (*dfrA12*) were identified (B). Ampicillin resistance gene (*blaTEM-1B*) and four ORFs, *hp1*, *abc*, *cupin* and *hp2* are also labeled (C). NCBI accession numbers are pUTI89 (CP000244), pRS218 (CP007150), pECO-fce (CP015160), pSF-173-1 (CP012632), pHUSEC41-3 (NC\_018997), and pEC16II (KU932034).

A

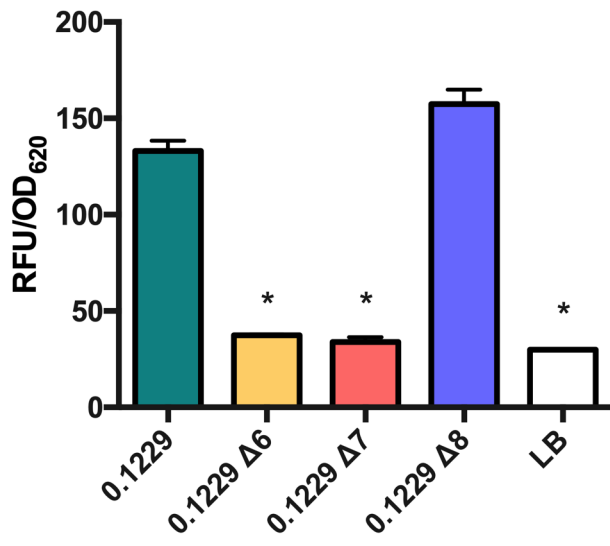

B

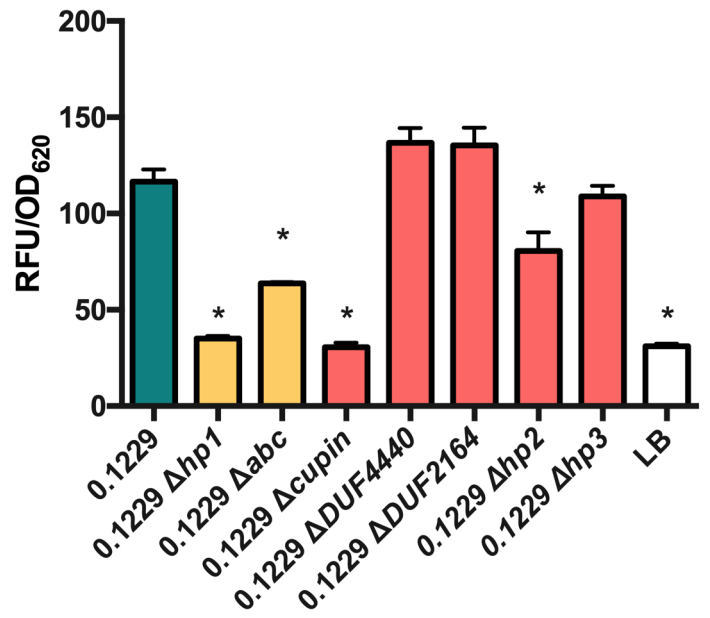

Fig. S3: W3110Δ*tolC* *PrecA-gfp* was grown with 0.1229 and 0.1229 regional (A) or individual ORF (B) knockouts, or alone indicated by LB. One-way ANOVA was used and levels marked with an asterisk were significantly lower than 0.1229 (Dunnett's test,  $p < 0.05$ ).

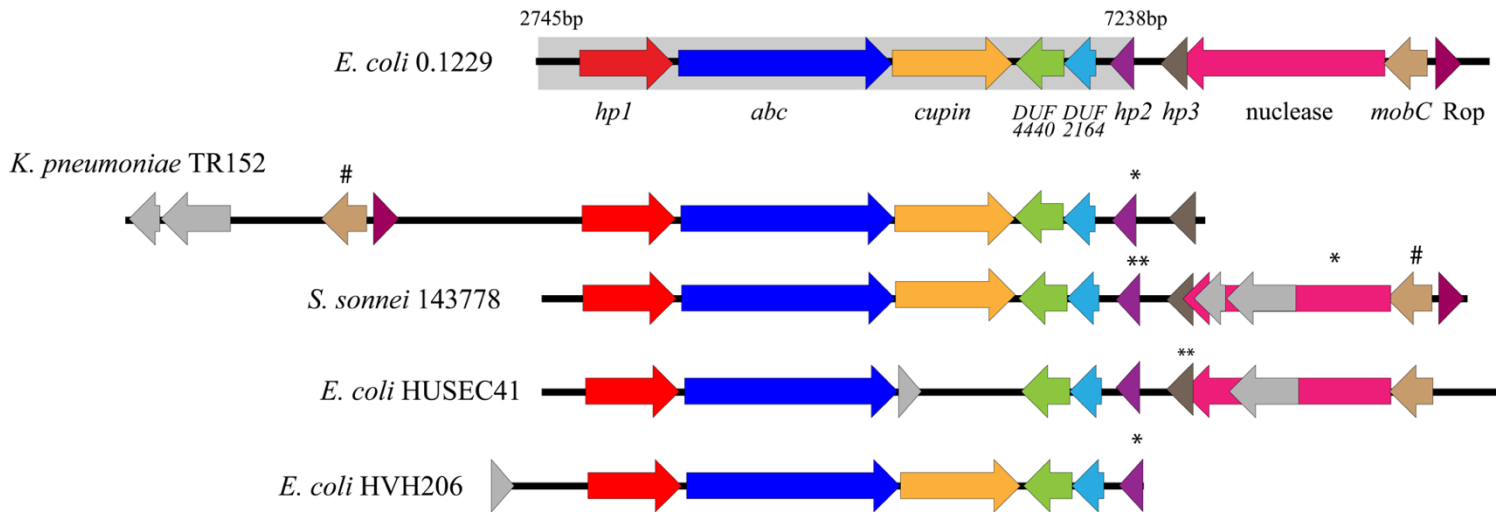

Fig. S4: Portion of p0.1229\_3 is compared to *K. pneumoniae* TR152 (SAMEA3729690), *S. sonnei* 143778 (SAMEA2057991), *E. coli* HUSEC41 (PRJEA73977), *E. coli* HVH206 (SAMN01885845). \* indicates one amino acid (aa) difference in that ORF. # indicates seven aa differences in that ORF. The grey shaded region is >99.6% nucleotide identical between all strains.

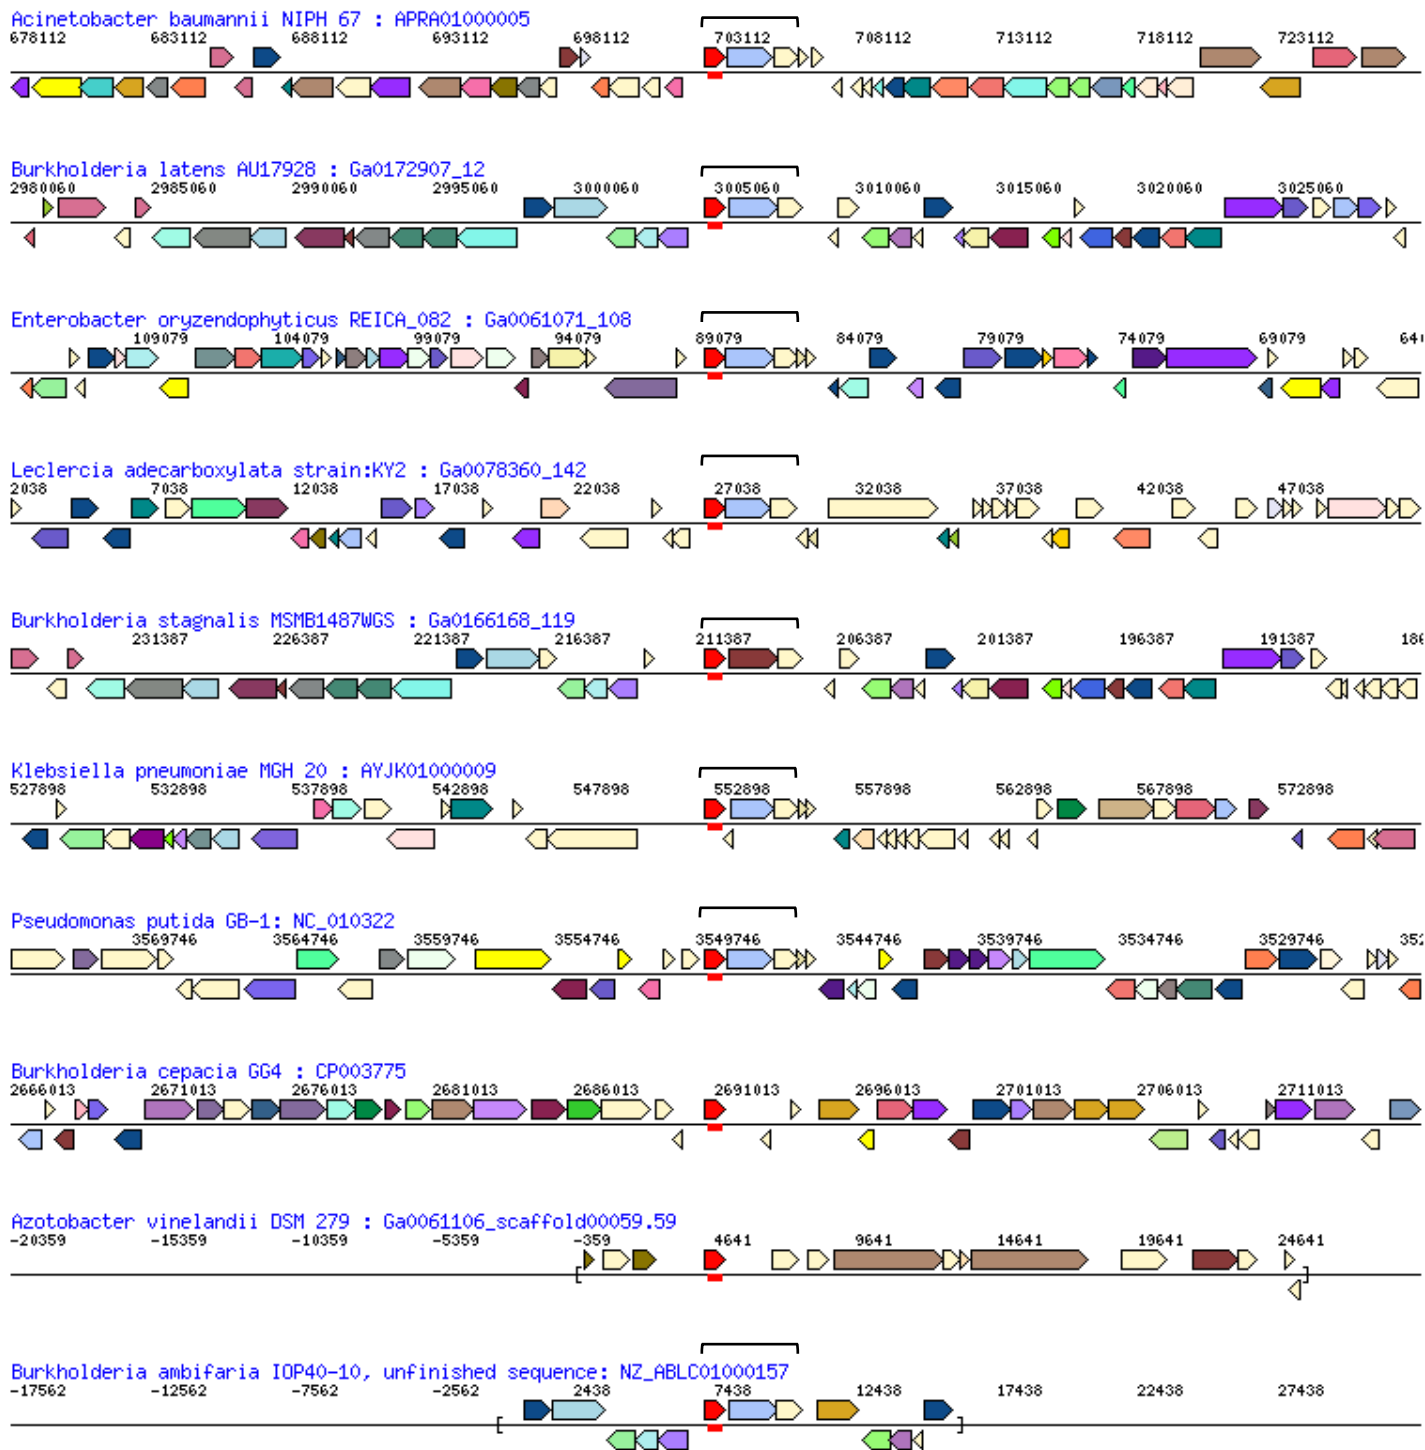

Fig. S5: Hp1 protein was compared to genomes on Integrated Microbial Genomes & Microbiomes of DOE's Joint Genome Institute. Using BLASTp, isolates were compared, sorted by BIT score, and then one strain from the top ten species were selected. % identity ranged from 32 to 68%. Hp1 homologs are colored in red. 8/10 have ABC transporters adjacent to Hp1,

colored in light blue or maroon. 9/10 have an annotated region similar to Cupin, colored in pale yellow, typically adjacent to the ABC transporter. DUF2164 is found in five strains, one in the reverse direction than Hp1. The *Burkholderia cepacia* strain encodes L-arabinose system upstream of Hp1. The bracket indicates groupings of Hp1, ABC and Cupin.

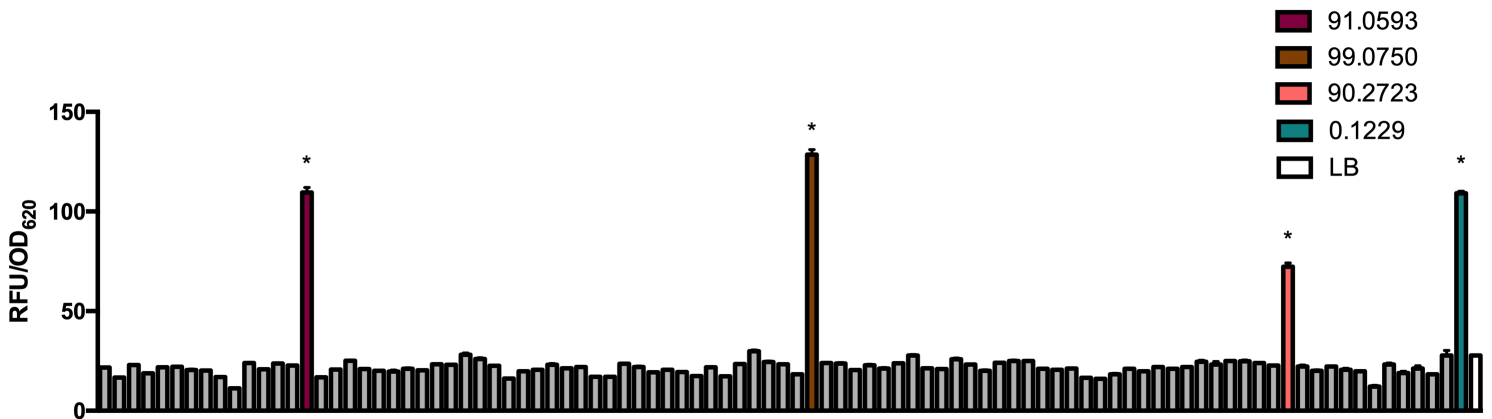

Fig. S6: W3110 $\Delta$ *tolC* *PrecA-gfp* was grown with 0.1229 or 101 human fecal isolates from the *E. coli* Reference Center at Penn State. As a control, W3110 *PrecA-GFP* was grown by itself indicated by LB. One-way ANOVA was used and levels marked with an asterisk were significantly higher than LB (Dunnett's test,  $p < 0.05$ ).
